# Supplementary material for: The abrupt climate change near 4,400 yr BP on the cultural transition in Yuchisi, China and its global linkage
Source: PubMed Central journal article supplement (PMC4901284; doi:10.1038/srep27723), 2016-06-10
Supplement: srep27723-s1.pdf [file srep27723-s1.pdf]

# **The abrupt climate change near 4,400 yr BP on the cultural transition in Yuchisi, China and its global linkage**

Jianjun Wang<sup>1,2</sup>, Liguang Sun<sup>2</sup>, Liqi Chen<sup>1</sup>, Libin Xu<sup>2,3</sup>, Yuhong Wang<sup>4</sup>,  
Xinming Wang<sup>5</sup>

<sup>1</sup> Key Laboratory of Global Change and Marine-Atmospheric Chemistry,  
Third Institute of Oceanography, State Oceanic Administration, Xiamen,  
China

<sup>2</sup> Institute of Polar Environment, University of Science and Technology of  
China, Hefei, China

<sup>3</sup> Zhangjiagang Water Supply & Drainage Company, Zhangjiagang, China

<sup>4</sup> National Institute of Health, USA

<sup>5</sup> Guangzhou Institute of Geochemistry, Chinese Academy of Sciences,  
Guangzhou, China

Correspondence and requests for materials should be addressed to J.W. (email:  
[wangjianjun@tio.org.cn](mailto:wangjianjun@tio.org.cn)) or L.S. (email: [slg@ustc.edu.cn](mailto:slg@ustc.edu.cn))

Supplemental Table1 A partial location list of “Bond’s Holocene IRD Event 3” in Figure 3

| Location       | Lon     | Lat    | Climate Change | References                                           |
|----------------|---------|--------|----------------|------------------------------------------------------|
| Yuchisi, China | 116.520 | 32.910 |                | this study                                           |
|                | 94.943  | 43.824 |                |                                                      |
|                | 93.861  | 40.911 |                |                                                      |
|                | 93.316  | 37.629 |                |                                                      |
|                | 83.921  | 32.101 |                |                                                      |
|                | 84.341  | 31.001 |                |                                                      |
|                | 84.279  | 30.514 |                |                                                      |
|                | 88.132  | 26.989 |                |                                                      |
| North China    | 98.921  | 30.883 | Drought        | Wu and Liu, 2004 and refs therein<br>Xia et al. 2003 |
|                | 102.408 | 31.182 |                |                                                      |
|                | 101.746 | 30.758 |                |                                                      |
|                | 102.112 | 30.216 |                |                                                      |
|                | 104.222 | 27.664 |                |                                                      |
|                | 123.612 | 37.566 |                |                                                      |
|                | 111.990 | 35.194 |                |                                                      |
|                | 111.687 | 34.527 |                |                                                      |
|                | 111.866 | 33.985 |                |                                                      |
|                | 116.147 | 34.896 |                |                                                      |
|                | 109.943 | 28.088 |                |                                                      |
|                | 120.724 | 26.627 |                |                                                      |
| South China    | 113.072 | 24.743 | Flood          | Wu and Liu, 2004 and refs therein                    |
|                | 113.617 | 24.256 |                |                                                      |
|                | 122.896 | 20.911 |                |                                                      |
|                | 121.269 | 20.487 |                |                                                      |
| Atlantic       | -38.011 | 44.875 | Cold           | Bond et al. 2001                                     |
|                | -12.351 | 53.524 |                |                                                      |
|                | -9.503  | 54.440 |                |                                                      |
| England        | -2.770  | 55.000 | Wet            | Barber et al. 2003<br>Hughes et al. 2000             |
|                | -9.500  | 54.200 |                |                                                      |
|                | -6.240  | 54.710 |                |                                                      |
|                |         |        |                |                                                      |
|                | 59.040  | 24.400 | Dust           | Cullen et al. 2000                                   |
|                | 6.000   | 46.370 |                |                                                      |
|                | 8.373   | 44.577 | Drought        | Drysdale et al. 2006                                 |
| Europe         | 35.000  | 32.000 |                |                                                      |
|                | 37.446  | 37.024 |                |                                                      |
|                | 22.830  | 68.680 |                | Korhola et al. 2000                                  |
|                | 18.070  | 67.360 | Wet            | Perry and Hsu 2000                                   |

|               | 87.550   | 70.370 | Laing and Smol 2003 |                                                   |
|---------------|----------|--------|---------------------|---------------------------------------------------|
|               | -106.807 | 42.149 |                     |                                                   |
|               | -104.188 | 40.335 |                     |                                                   |
|               | -102.156 | 41.817 |                     |                                                   |
|               | -95.052  | 46.663 |                     |                                                   |
| North America | -91.458  | 43.178 | Drought             | Booth et al. 2005 and refs therein                |
|               | -89.641  | 41.267 |                     |                                                   |
|               | -88.797  | 46.307 |                     |                                                   |
|               | -85.964  | 46.257 |                     |                                                   |
|               | -105.600 | 39.730 |                     |                                                   |
|               | 32.500   | -1.500 |                     |                                                   |
|               | 29.050   | -6.140 |                     |                                                   |
|               | 28.930   | -1.850 |                     |                                                   |
|               | 31.100   | 0.500  |                     |                                                   |
|               | 29.540   | 1.700  |                     |                                                   |
|               | 32.480   | -1.170 |                     |                                                   |
|               | 34.300   | 1.100  |                     |                                                   |
|               | 36.450   | -1.200 |                     |                                                   |
|               | 36.940   | -2.400 |                     |                                                   |
|               | 38.050   | 7.030  |                     |                                                   |
|               | 39.140   | 7.850  |                     |                                                   |
|               | 36.250   | 3.250  |                     |                                                   |
|               | 28.450   | 1.500  |                     |                                                   |
| Africa        | 10.150   | 3.560  | Drought             | Marchanta and Hooghiemstra 2004, and refs therein |
|               | 10.080   | 2.850  |                     |                                                   |
|               | -1.250   | 6.300  |                     |                                                   |
|               | 9.050    | 3.240  |                     |                                                   |
|               | 17.000   | 14.500 |                     |                                                   |
|               | 14.300   | 13.500 |                     |                                                   |
|               | -16.500  | 16.300 |                     |                                                   |
|               | 37.350   | -3.080 |                     |                                                   |
|               | -18.600  | 21.750 |                     |                                                   |
|               | 10.000   | 1.000  |                     |                                                   |
|               | 15.400   | 16.200 |                     |                                                   |
|               | 5.500    | 15.500 |                     |                                                   |
|               | 11.010   | 13.120 |                     |                                                   |
|               | 10.560   | 13.180 |                     |                                                   |
|               | -4.150   | 16.500 |                     |                                                   |
|               | 32.100   | 10.010 |                     |                                                   |
|               | 11.040   | -3.140 |                     |                                                   |
|               | -110.434 | 32.126 |                     |                                                   |

|               |          |         |        |                                                      |
|---------------|----------|---------|--------|------------------------------------------------------|
|               | -110.329 | 32.484  |        |                                                      |
|               | -109.414 | 32.790  |        |                                                      |
|               | -109.212 | 32.990  |        |                                                      |
|               | -110.795 | 33.400  |        |                                                      |
|               | -111.124 | 33.853  |        |                                                      |
|               | -111.654 | 33.969  |        |                                                      |
|               | -111.799 | 34.411  |        |                                                      |
| North America | -113.253 | 34.273  | flood  | Ely et al. 1993                                      |
|               | -113.566 | 34.326  |        |                                                      |
|               | -113.831 | 33.947  |        |                                                      |
|               | -111.485 | 35.390  |        |                                                      |
|               | -112.482 | 36.094  |        |                                                      |
|               | -111.631 | 36.283  |        |                                                      |
|               | -111.766 | 36.389  |        |                                                      |
|               | -111.197 | 36.862  |        |                                                      |
|               | -111.188 | 37.031  |        |                                                      |
|               | -112.907 | 36.547  |        |                                                      |
|               | -113.598 | 36.315  |        |                                                      |
|               | -118.900 | 55.200  |        |                                                      |
|               | -118.000 | 53.600  |        |                                                      |
| <hr/>         |          |         |        |                                                      |
|               | -68.880  | -18.160 |        |                                                      |
|               | -70.050  | -13.450 |        |                                                      |
|               | -69.850  | -12.080 |        |                                                      |
|               | -66.680  | 0.260   |        |                                                      |
|               | -46.680  | -19.500 |        |                                                      |
|               | -49.450  | -17.280 |        |                                                      |
|               | -47.580  | -15.560 |        |                                                      |
|               | -47.450  | -19.560 |        |                                                      |
|               | -47.030  | 5.180   |        |                                                      |
|               | -46.780  | -19.000 |        |                                                      |
| South America | -38.000  | -5.500  | Wetter | Marchanta and Hooghiemstra<br>2004, and refs therein |
|               | -49.150  | -27.700 |        |                                                      |
|               | -77.890  | 1.660   |        |                                                      |
|               | -76.600  | 2.530   |        |                                                      |
|               | -70.210  | 4.050   |        |                                                      |
|               | -74.140  | 4.040   |        |                                                      |
|               | -73.540  | 3.460   |        |                                                      |
|               | -73.350  | 3.220   |        |                                                      |
|               | -70.540  | 4.450   |        |                                                      |
|               | -69.450  | 4.950   |        |                                                      |
|               | -65.450  | 4.150   |        |                                                      |
|               | -67.750  | 10.320  |        |                                                      |

## References

- Barber KE, Chambers FM, Maddy D. Holocene palaeoclimates from peat stratigraphy: macrofossil proxy climate records from three oceanic raised bogs in England and Ireland. *Quat. Sci. Rev.* **22**, 521-539 (2003).
- Bond G, *et al.* Persistent Solar Influence on North Atlantic Climate During the Holocene. *Science* **294**, 2130 (2001).
- Booth RK, *et al.* A severe centennial-scale drought in midcontinental North America 4200 years ago and apparent global linkages. *The Holocene* **15**, 321-328 (2005).
- Cullen HM, *et al.* Climate change and the collapse of the Akkadian empire: Evidence from the deep sea. *Geology* **28**, 379-382 (2000).
- Drysdale R, *et al.* Late Holocene drought responsible for the collapse of Old World civilizations is recorded in an Italian cave flowstone. *Geology* **34**, 101-104 (2006).
- Ely LL, Enzel Y, Baker VR, Cayan DR. A 5000-Year Record of Extreme Floods and Climate Change in the Southwestern United States. *Science* **262**, 410-412 (1993).
- Hughes PDM, Mauquoy D, Barber KE, Langdon PG. Mire-development pathways and palaeoclimatic records from a full Holocene peat archive at Walton Moss, Cumbria, England. *Holocene* **10**, 465-475 (2000).
- Korhola A, Weckstrom J, Holmstrom L, Erasto P. A Quantitative Holocene Climatic Record from Diatoms in Northern Fennoscandia. *Quat. Res.* **54**, 284-294 (2000).
- Laing TE, Smol JP. Late Holocene environmental changes inferred from diatoms in a lake on the western Taimyr Peninsula, northern Russia. *J. Paleolimnol.* **30**, 231-

247 (2003).

Marchant R, Hooghiemstra H. Rapid environmental change in African and South American tropics around 4000 years before present: a review. *Earth Sci. Rev.* **66**, 217-260 (2004).

Perry CA, Hsu KJ. Geophysical, archaeological, and historical evidence support a solar-output model for climate change. *Proc. Natl. Acad. Sci. U. S. A.* **97**, 12433-12438 (2000).

Xia Z, Yang X, Ye M. Prehistorical hazards of Lajia Site, Qinghai, China. *Chin. Sci. Bull.* **48**, 1200-1204 (in Chinese) (2003).
